# Supplementary material for: The Obesity Paradox and Mortality in Older Adults: A Systematic Review
Source: MDPI journal article supplement (doi:10.3390/nu15071780), 2023-04-06
Supplement: s1 [file s1]

Table S1: Outcome and results of association between body mass index groups and mortality in aged adults (detailed information)

| Author, year         | Outcome               | Medical condition | Analysis    | Results                          |                    |        | Obesity paradox |
|----------------------|-----------------------|-------------------|-------------|----------------------------------|--------------------|--------|-----------------|
|                      |                       |                   |             | BMI Classes (kg/m <sup>2</sup> ) | Estimates (95% CI) | p      |                 |
| Kananen, 2022 [68]   | In-hospital mortality | Covid-19          | Adjusted OR | <18.5                            | 2.30 (1.17–4.31)   | .01    | No              |
|                      |                       |                   |             | 18.5–24.9                        | Reference          |        |                 |
|                      |                       |                   |             | 25.0–29.9                        | 1.05 (0.63–1.70)   | .86    |                 |
|                      |                       |                   |             | ≥ 30.0                           | 1.23 (0.57–2.45)   | .58    |                 |
| Amin, 2021 [11]      | 30-day mortality      | Hip fracture      | Adjusted HR | <18.5                            | 1.54 (1.06–2.24)   | <.0001 | Yes             |
|                      |                       |                   |             | 18.5–24.9                        | Reference          |        |                 |
|                      |                       |                   |             | 25.0–29.9                        | 0.69 (0.62–0.77)   | <.0001 |                 |
|                      |                       |                   |             | 30.0–34.9                        | 0.62 (0.51–0.74)   | <.0001 |                 |
|                      |                       |                   |             | 35.0–39.9                        | 0.69 (0.50–0.95)   | .02    |                 |
|                      |                       |                   |             | 40.0–49.9                        | 0.65 (0.38–1.13)   | .13    |                 |
|                      |                       |                   |             | ≥ 50.0                           | 1.15 (0.51–2.60)   | .73    |                 |
| Danninger, 2021 [52] | ICU mortality         | Sepsis            | Adjusted OR | <18.5                            | 1.57 (1.16–2.12)   | .003   | Yes             |
|                      |                       |                   |             | 18.5–24.9                        | Reference          |        |                 |
|                      |                       |                   |             | 25.0–29.9                        | 0.88 (0.73–1.06)   | .18    |                 |
|                      |                       |                   |             | ≥ 30.0                           | 0.82 (0.68–0.98)   | .03    |                 |
| El Moheb, 2021 [12]  | 30-day mortality      | Emergent surgery  | Adjusted HR | 18.5–24.9                        | Reference          |        | Yes             |
|                      |                       |                   |             | 25.0–29.9                        | 0.80 (0.75–0.84)   | <.05   |                 |
|                      |                       |                   |             | 30.0–34.9                        | 0.80 (0.74–0.85)   | <.05   |                 |

|                          |                    |                  |                       |                  |                  |        |     |  |
|--------------------------|--------------------|------------------|-----------------------|------------------|------------------|--------|-----|--|
| Lin, 2021 [13]           | 84-month mortality | None specific    | Adjusted HR           | 35.0–39.9        | 0.70 (0.63–0.77) | <.05   | Yes |  |
|                          |                    |                  |                       | ≥ 40.0           | 0.82 (0.74–0.91) | <.05   |     |  |
|                          |                    |                  |                       | <18.5            | 1.95 (1.79–2.12) | <.01   |     |  |
|                          |                    |                  |                       | 18.5–23.9        | Ref.             |        |     |  |
|                          |                    |                  |                       | 24.0–26.9        | 0.75 (0.71–0.80) | <.01   |     |  |
|                          |                    |                  |                       | ≥ 27.0           | 0.74 (0.69–0.79) | <.01   |     |  |
| Martinez-Tapia,2021 [14] | 12-month mortality | Cancer           | Unadjusted HR (Men)   | <22.5            | 1.64 (1.31-2.07) | <.0001 | Yes |  |
|                          |                    |                  |                       | 22.5–24.9        | Reference        |        |     |  |
|                          |                    |                  |                       | 25.0–29.9        | 0.88 (0.69-1.11) |        |     |  |
|                          |                    |                  | ≥ 30.0                | 0.70 (0.50-0.98) |                  |        |     |  |
|                          |                    |                  | Unadjusted HR (Women) | <22.5            | 1.65 (1.25-2.18) |        |     |  |
|                          |                    |                  |                       | 22.5–24.9        | Reference        |        |     |  |
|                          | 25.0–29.9          |                  |                       | 1.03 (0.76-1.40) |                  |        |     |  |
|                          | 60-month mortality |                  | ≥ 30.0                | 0.72 (0.49-1.06) |                  | <.0001 | Yes |  |
|                          |                    |                  | Unadjusted HR (Men)   | <22.5            | 1.51 (1.25-1.81) |        |     |  |
|                          |                    |                  |                       | 22.5–24.9        | Reference        |        |     |  |
|                          |                    |                  |                       | 25.0–29.9        | 0.84 (0.70-1.01) |        |     |  |
|                          |                    |                  | Unadjusted HR (Women) | ≥ 30.0           | 0.74 (0.58-0.95) |        |     |  |
| <22.5                    |                    | 1.31 (0.07-1.61) |                       |                  |                  |        |     |  |
| 22.5–24.9                | Reference          |                  |                       |                  |                  |        |     |  |
|                          |                    |                  |                       | 25.0–29.9        | 0.95 (0.77-1.18) |        |     |  |
|                          |                    |                  |                       | ≥ 30.0           | 0.60 (0.46-0.79) |        |     |  |
| Lai, 2020 [15]           | 72-month           | None specific    | Adjusted HR           | <18.5            | 1.80 (1.11-2.94) | .02    | No  |  |

|                      |                     |                 |                     |                                    |                  |      |     |
|----------------------|---------------------|-----------------|---------------------|------------------------------------|------------------|------|-----|
|                      | mortality           |                 |                     | 18.5–23.9                          | Reference        |      |     |
|                      |                     |                 |                     | 24.0–26.9                          | 1.23 (0.68–2.21) | .50  |     |
|                      |                     |                 |                     | ≥ 27.0                             | 0.39 (0.14–1.07) | .07  |     |
| Schneider, 2020 [16] | 12-month mortality  | Glioblastoma    | Adjusted OR         | <30.0                              | 3.10 (1.10–9.20) | .04  | Yes |
|                      |                     |                 |                     | ≥ 30.0                             | Reference        |      |     |
|                      |                     |                 |                     | 10 <sup>th</sup> percentile (19.8) | 1.30 (0.92–1.83) | NS   |     |
|                      |                     |                 | Adjusted HR (Men)   | 50 <sup>th</sup> percentile (23.3) | Reference        |      | No  |
|                      |                     |                 |                     | 90 <sup>th</sup> percentile (27.2) | 0.65 (0.41–1.03) | NS   |     |
| Seino, 2020 [53]     | All-cause mortality | None specific   |                     | 10 <sup>th</sup> percentile (18.9) | 1.87 (1.18–2.95) | S    |     |
|                      |                     |                 | Adjusted HR (Women) | 50 <sup>th</sup> percentile (22.8) | Reference        |      | No  |
|                      |                     |                 |                     | 90 <sup>th</sup> percentile (27.3) | 0.88 (0.54–1.42) | NS   |     |
|                      |                     |                 |                     | <18.5                              | 1.55 (0.41–5.85) | .52  |     |
| Nishida, 2019 [17]   | 36-month mortality  | None specific   | Adjusted HR         | 18.5–23.0                          | Reference        |      | No  |
|                      |                     |                 |                     | 23.0–27.5                          | 1.00 (0.42–2.39) | 1.00 |     |
|                      |                     |                 |                     | ≥ 27.5                             | 0.96 (0.12–7.67) | .97  |     |
| Om, 2019 [18]        | 12-month mortality  | Aortic stenosis | Unadjusted rates    | ≤22.3                              | 19%              | .006 | Yes |
|                      |                     |                 |                     | 22.4–24.8                          | 10%              |      |     |

|                      |                           |               |               |           |                   |       |     |      |
|----------------------|---------------------------|---------------|---------------|-----------|-------------------|-------|-----|------|
|                      |                           |               |               | ≥ 24.9    | 6%                |       |     |      |
| Tokarek, 2019 [54]   | 12-month survival         | TAVI patients | Unadjusted HR | 18.5–24.9 | Reference         | .008  | Yes |      |
|                      |                           |               |               | 25.0–29.9 | 2.26 (0.91–5.60)  |       |     |      |
|                      |                           |               |               | ≥ 30.0    | 3.86 (1.43–10.46) |       |     |      |
| Yoshihisa, 2019 [19] | In-hospital mortality     | AHF           | Unadjusted OR | ≥ 25.0    | Reference         | <.001 | Yes |      |
|                      |                           |               |               | < 25.0    | 3.49 (2.05–5.97)  |       |     |      |
| Crotti, 2018 [20]    | 68-month mortality        | None specific | Adjusted HR   | 18.5–24.9 | Reference         | <.05  | Yes |      |
|                      |                           |               |               | 25.0–29.9 | 0.76 (0.63–0.92)  |       |     |      |
|                      |                           |               |               | 30.0–39.9 | 0.85 (0.69–1.04)  |       |     | NS   |
|                      |                           |               |               | ≥ 40.0    | 1.53 (0.92–2.52)  |       |     | NS   |
|                      | 68-month CVD mortality    |               |               | 18.5–24.9 | Reference         | NS    | No  |      |
|                      |                           |               |               | 25.0–29.9 | 0.81 (0.61–1.08)  |       |     |      |
|                      |                           |               |               | 30.0–39.9 | 0.92 (0.67–1.26)  |       |     | NS   |
|                      |                           |               |               | ≥ 40.0    | 1.14 (0.45–2.88)  |       |     | NS   |
|                      | 68-month cancer mortality |               |               | 18.5–24.9 | Reference         | NS    | No  |      |
|                      |                           |               |               | 25.0–29.9 | 0.99 (0.70–1.39)  |       |     |      |
|                      |                           |               |               | 30.0–39.9 | 1.07 (0.74–1.54)  |       |     | NS   |
|                      |                           |               |               | ≥ 40.0    | 2.91 (1.43–5.94)  |       |     | <.05 |
| De Palma, 2018 [21]  | 12-month mortality        | TAVI patients | Unadjusted HR | ≥ 25.0    | 0.63 (0.45–0.86)  | .005  | Yes |      |
|                      |                           |               |               | < 25.0    | Reference         |       |     |      |
|                      | 50-month mortality        |               | Unadjusted HR | ≥ 25.0    | 0.68 (0.50–0.93)  | .02   | Yes |      |
|                      |                           |               |               | < 25.0    | Reference         |       |     |      |
| Keller, 2018 [55]    |                           | AMI           | Unadjusted    | <30       | Reference         |       | Yes |      |

|                |                       |               |                     |           |                   |        |     |
|----------------|-----------------------|---------------|---------------------|-----------|-------------------|--------|-----|
| Kim, 2018 [22] | In-hospital mortality |               | OR <sup>#</sup>     | 30–34.9   | 0.41 (0.36–0.48)  | <.0001 | Yes |
|                |                       |               |                     | 35–39.9   | 0.59 (0.47–0.74)  | <.0001 |     |
|                |                       |               |                     | ≥ 40      | 0.73 (0.54–0.98)  | .04    |     |
|                | 60-month mortality    | None specific | Adjusted HR (men)   | 16.0–17.4 | 2.87 (2.60-3.18)  | <.0001 |     |
|                |                       |               |                     | 17.5–19.9 | 1.84 (1.74-1.95)  | <.0001 |     |
|                |                       |               |                     | 20.0–22.4 | 1.25 (1.119-1.31) | <.0001 |     |
|                |                       |               |                     | 22.5–24.9 | Reference         |        |     |
|                |                       |               |                     | 25.0–27.4 | 0.86 (0.81-0.91)  | <.0001 |     |
|                |                       |               |                     | 27.5–29.9 | 0.79 (0.71-0.87)  | <.0001 |     |
|                |                       |               |                     | ≥ 30.0    | 0.93 (0.78-1.12)  | .45    |     |
|                |                       |               | Adjusted HR (women) | 16.0–17.4 | 2.94 (2.57-3.37)  | <.0001 |     |
|                |                       |               |                     | 17.5–19.9 | 1.94 (1.79-2.09)  | <.0001 |     |
|                |                       |               |                     | 20.0–22.4 | 1.29 (1.21-1.38)  | <.0001 |     |
|                |                       |               |                     | 22.5–24.9 | Reference         |        |     |
|                |                       |               |                     | 25.0–27.4 | 0.84 (0.78-0.91)  | <.0001 |     |
|                |                       |               |                     | 27.5–29.9 | 0.89 (0.81-0.97)  | .01    |     |
|                |                       |               |                     | ≥ 30.0    | 0.92 (0.80-1.05)  | .21    |     |
| Lee, 2018 [56] | 60-month mortality    | None specific | Adjusted HR         | <18.5     | 2.58 (2.24-2.97)  | <.05   | No  |
|                |                       |               |                     | 18.5–22.9 | 1.41 (1.29-1.55)  | <.05   |     |
|                |                       |               |                     | 23.0–24.9 | Reference         |        |     |
|                |                       |               |                     | 25.0–27.4 | 1.02 (0.91-1.14)  | NS     |     |
|                |                       |               |                     | 27.5–29.9 | 0.92 (0.77-1.09)  | NS     |     |
|                |                       |               |                     | ≥ 30.0    | 1.12 (0.85-1.47)  | NS     |     |

|                                |                        |                        |                                         |           |                  |        |     |
|--------------------------------|------------------------|------------------------|-----------------------------------------|-----------|------------------|--------|-----|
| Lv, 2018 [23]                  | 36-month<br>mortality  | None specific          | Adjusted HR                             | <18.5     | Reference        |        | Yes |
|                                |                        |                        |                                         | 18.5–22.0 | 0.71 (0.60–0.83) | <0.01  |     |
|                                |                        |                        |                                         | ≥ 24.0    | 0.60 (0.47–0.76) | <0.01  |     |
| de Souto Barreto, 2017<br>[24] | 18-month<br>mortality  | Dementia               | Adjusted<br>HR<br>(With dementia)       | <18.5     | 1.61 (1.25–2.09) | <.0001 | Yes |
|                                |                        |                        |                                         | 18.5–24.9 | Reference        |        |     |
|                                |                        |                        |                                         | 25.0–29.9 | 0.60 (0.49–0.75) | <.0001 |     |
|                                |                        |                        |                                         | ≥ 30.0    | 0.54 (0.38–0.76) | <.0001 |     |
|                                |                        |                        | Adjusted<br>HR<br>(Without<br>dementia) | <18.5     | 1.19 (0.87–1.64) | .28    | No  |
|                                |                        |                        |                                         | 18.5–24.9 | Reference        |        |     |
|                                |                        |                        |                                         | 25.0–29.9 | 0.81 (0.65–1.00) | .05    |     |
| Wu, 2017 [25]                  | 12-month<br>mortality  | Atrial<br>fibrillation | Adjusted<br>HR<br>(65–74 years)         | <18.5     | 1.56 (0.69–3.51) | NS     | No  |
|                                |                        |                        |                                         | 18.5–23.9 | Reference        |        |     |
|                                |                        |                        |                                         | 24.0–27.9 | 0.29 (0.13–0.62) | <.05   |     |
|                                |                        |                        |                                         | ≥ 28.0    | 0.61 (0.23–1.60) | NS     |     |
|                                |                        |                        | Adjusted<br>HR<br>(≥ 75 years)          | <18.5     | 0.95 (0.59–1.52) | NS     | Yes |
|                                |                        |                        |                                         | 18.5–23.9 | Reference        |        |     |
|                                |                        |                        |                                         | 24.0–27.9 | 0.69 (0.47–0.99) | <.05   |     |
| Cheng, 2016 [57]               | 132-month<br>mortality | None specific          | Adjusted HR                             | ≥ 28.0    | 0.46 (0.22–0.95) | <.05   | Yes |
|                                |                        |                        |                                         | <18.5     | 3.35 (1.88–5.96) | <.05   |     |
|                                |                        |                        |                                         | 18.5–24.9 | Reference        |        |     |
|                                |                        |                        |                                         | 25.0–29.9 | 0.80 (0.70–0.90) | <.05   |     |
|                                |                        |                        |                                         | 30.0–34.9 | .078 (0.69–0.89) | <.05   |     |
|                                |                        |                        |                                         |           |                  |        |     |

|                   |                   |               |             |             |                  |      |     |
|-------------------|-------------------|---------------|-------------|-------------|------------------|------|-----|
|                   |                   |               |             | 35.0–39.9   | 0.96 (0.81–1.12) | NS   |     |
|                   |                   |               |             | ≥ 40.0      | 1.17 (0.93–1.47) | NS   |     |
|                   |                   |               |             | <18.5       | -                |      |     |
|                   |                   |               |             | 18.5–24.9   | Reference        |      |     |
|                   |                   | Diabetes      |             | 25.0–29.9   | 0.75 (0.61–0.93) | <.05 | Yes |
|                   |                   |               |             | 30.0–34.9   | 0.78 (0.63–0.96) | <.05 |     |
|                   |                   |               |             | 35.0–39.9.9 | 0.90 (0.70–1.15) | NS   |     |
|                   |                   |               |             | ≥ 40.0      | 1.09 (0.79–1.49) | NS   |     |
|                   |                   |               |             | <18.5       | 2.75 (1.36–5.56) | <.05 |     |
|                   |                   |               |             | 18.5–24.9   | Reference        |      |     |
|                   |                   | Hypertension  |             | 25.0–29.9   | 0.82 (0.72–0.93) | <.05 | Yes |
|                   |                   |               |             | 30.0–34.9   | 0.80 (0.70–0.92) | <.05 |     |
|                   |                   |               |             | 35.0–39.9.9 | 0.98 (0.83–1.17) | NS   |     |
|                   |                   |               |             | ≥ 40.0      | 1.13 (0.89–1.44) | NS   |     |
|                   |                   |               |             | <18.5       | 2.74 (1.36–5.53) | <.05 |     |
|                   |                   |               |             | 18.5–24.9   | Reference        |      |     |
|                   |                   | Dyslipidaemia |             | 25.0–29.9   | 0.81 (0.72–0.91) | <.05 |     |
|                   |                   |               |             | 30.0–34.9   | 0.81 (0.71–0.92) | <.05 |     |
|                   |                   |               |             | 35.0–39.9.9 | 1.02 (0.86–1.20) | NS   |     |
|                   |                   |               |             | ≥ 40.0      | 1.21 (0.96–1.53) | NS   |     |
|                   |                   |               |             | <22.0       | Reference        |      |     |
| Flodin, 2016 [26] | 12-month survival | Hip fracture  | Adjusted OR | 22.0–26.0   | 0.90 (0.60–1.40) | .60  | Yes |
|                   |                   |               |             | > 26.0      | 2.60 (1.20–5.50) | .01  |     |

|                    |                           |                      |                |           |                  |       |     |
|--------------------|---------------------------|----------------------|----------------|-----------|------------------|-------|-----|
| Calabia, 2015 [58] | 120-month<br>mortality    | Haemodialysis        | Adjusted<br>HR | <18.0     | 2.23 (1.87–2.66) | <.001 | Yes |
|                    |                           |                      |                | 18.0–19.9 | 1.76 (1.51–2.05) | <.001 |     |
|                    |                           |                      |                | 20.0–21.4 | 1.47 (1.26–1.71) | <.001 |     |
|                    |                           |                      |                | 21.5–22.9 | 1.32 (1.14–1.52) | <.001 |     |
|                    |                           |                      |                | 23.0–24.9 | Reference        |       |     |
|                    |                           |                      |                | 25.0–27.4 | 1.03 (0.89–1.18) | NS    |     |
|                    |                           |                      |                | 27.5–29.9 | 0.93 (0.79–1.10) | NS    |     |
|                    |                           |                      |                | 30.0–34.9 | 0.76 (0.62–0.93) | <.001 |     |
|                    |                           |                      |                | ≥ 35.0    | 0.77 (0.54–1.10) | NS    |     |
| Kim, 2015 [59]     | 108-month<br>mortality    | Chronic<br>diseases  | Adjusted<br>HR | <18.5     | 2.07 (1.56–2.75) | <.05  | No  |
|                    |                           |                      |                | 18.5–19.9 | 1.56 (1.20–2.02) | <.05  |     |
|                    |                           |                      |                | 20.0–21.4 | 1.22 (0.96–1.55) | NS    |     |
|                    |                           |                      |                | 21.5–22.9 | 1.21 (0.97–1.52) | NS    |     |
|                    |                           |                      |                | 23.0–24.9 | Reference        |       |     |
|                    |                           |                      |                | 25.0–26.4 | 0.90 (0.69–1.18) | NS    |     |
|                    |                           |                      |                | 26.5–27.9 | 1.06 (0.76–1.47) | NS    |     |
|                    |                           |                      |                | 28.0–29.9 | 0.84 (0.56–1.27) | NS    |     |
|                    |                           |                      |                | 30.0–32.4 | 0.81 (0.42–1.56) | NS    |     |
| Kubota, 2015 [60]  | 132-month<br>ID mortality | Diabetes<br>mellitus | Adjusted<br>HR | <20.0     | 1.25 (0.71–2.20) | NS    | Yes |
|                    |                           |                      |                | 20.0–22.9 | Reference        |       |     |
|                    |                           |                      |                | 23.0–24.9 | 0.55 (0.30–1.03) | NS    |     |
|                    |                           |                      |                | ≥ 25.0    | 0.54 (0.30–0.98) | <.05  |     |



|                      |                     |                   |                        |           |                  |       |     |
|----------------------|---------------------|-------------------|------------------------|-----------|------------------|-------|-----|
| Kuo, 2015 [27]       | 66-month mortality  | Diabetes mellitus | Unadjusted HR*         | 17.5–19.9 | 1.80             | <.001 | No  |
|                      |                     |                   |                        | 20.0–22.4 | 1.20             | NS    |     |
|                      |                     |                   |                        | 22.5–24.9 | Reference        |       |     |
|                      |                     |                   |                        | 25.0–27.4 | 0.95             | NS    |     |
|                      |                     |                   |                        | 27.5–29.9 | 0.79             | NS    |     |
|                      |                     |                   |                        | 30.0–32.5 | 1.62             | <.001 |     |
|                      |                     |                   |                        | 32.5–35.0 | 2.58             | <.001 |     |
| Shil Hong, 2015 [61] | 72-month mortality  | None specific     | Adjusted HR            | 15.3–21.7 | Reference        |       | Yes |
|                      |                     |                   |                        | 21.8–23.7 | 0.76 (0.53–1.10) | .004  |     |
|                      |                     |                   |                        | 23.8–25.4 | 0.63 (0.41–0.96) |       |     |
|                      |                     |                   |                        | 25.5–33.7 | 0.54 (0.34–0.86) |       |     |
| Buys, 2014 [28]      | 102-month mortality | None specific     | Adjusted HR            | <18.5     | 1.57 (0.88–2.82) | NS    | No  |
|                      |                     |                   |                        | 18.5–24.9 | Reference        |       |     |
|                      |                     |                   |                        | 25.0–29.9 | 0.94 (0.73–1.21) | NS    |     |
|                      |                     |                   |                        | 30.0–34.9 | 0.80 (0.58–1.09) | NS    |     |
|                      |                     |                   |                        | ≥ 35.0    | 0.73 (0.49–1.09) | NS    |     |
| Clark, 2014 [62]     | 120-month mortality | None specific     | Adjusted HR (Africans) | <18.5     | 1.34 (1.11–1.63) | <.05  | No  |
|                      |                     |                   |                        | 18.5–24.9 | Reference        |       |     |
|                      |                     |                   |                        | 25.0–29.9 | 0.81 (0.61–1.07) | NS    |     |
|                      |                     |                   | Adjusted HR (African)  | ≥ 30.0    | 0.82 (0.54–1.24) | NS    | No  |
|                      |                     |                   |                        | <18.5     | 2.59 (1.44–4.65) | <.05  |     |
|                      |                     |                   |                        | 18.5–24.9 | Reference        |       |     |
|                      |                     |                   |                        | 25.0–29.9 | 0.91 (0.72–1.15) | NS    |     |

|                   |                       |                  |                |           |                  |        |     |
|-------------------|-----------------------|------------------|----------------|-----------|------------------|--------|-----|
|                   |                       |                  | Americans)     | ≥ 30.0    | 1.04 (0.83–1.31) | NS     |     |
|                   |                       |                  |                | <18.5     | 1.47 (0.84-547)  | .18    |     |
|                   |                       |                  |                | 18.5–24.9 | Reference        |        |     |
| Ford, 2014 [29]   | 40-month<br>mortality | None specific    | Adjusted HR    | 25.0–29.9 | 0.78 (0.60-1.00) | .05    | No  |
|                   |                       |                  |                | 30.0–34.9 | 0.80 (0.59-1.10) | .17    |     |
|                   |                       |                  |                | ≥ 35.0    | 0.75 (0.48-1.17) | .20    |     |
|                   |                       |                  |                | <18.0     | 1.80 (1.00–3.00) | .04    |     |
|                   | 6-week<br>mortality   |                  | Adjusted<br>HR | 18.0–24.9 | Reference        |        | Yes |
|                   |                       |                  |                | 25.0–29.9 | 0.90 (0.70–1.40) | .77    |     |
|                   |                       |                  |                | ≥ 30.0    | 0.50 (0.30–0.90) | .02    |     |
|                   |                       |                  |                | <18.0     | 2.00 (1.50–2.70) | <.001  |     |
| Lang, 2014 [30]   | 12-month<br>mortality | None<br>specific | Adjusted<br>HR | 18.0–24.9 | Reference        |        | Yes |
|                   |                       |                  |                | 25.0–29.9 | 0.80 (0.70–1.00) | .04    |     |
|                   |                       |                  |                | ≥ 30.0    | 0.70 (0.50–0.90) | .002   |     |
|                   |                       |                  |                | <18.0     | 1.80 (1.30–2.30) | <.001  |     |
|                   | 24-month<br>mortality |                  | Adjusted<br>HR | 18.0–24.9 | Reference        |        | Yes |
|                   |                       |                  |                | 25.0–29.9 | 0.80 (0.70–1.00) | .04    |     |
|                   |                       |                  |                | ≥ 30.0    | 0.70 (0.60–0.90) | .002   |     |
|                   |                       |                  |                | <18.5     | 2.04 (1.55-2.70) | <.0001 |     |
|                   |                       |                  |                | 18.5–24.9 | Reference        |        |     |
| Lee, 2014 [31]    | 36-month<br>mortality | None specific    | Adjusted HR    | 25.0–29.9 | 0.74 (0.57-0.96) | <.05   | Yes |
|                   |                       |                  |                | ≥ 30.0    | 1.01 (0.57-1.79) | NS     |     |
| Murphy, 2014 [63] | 84-month              | Diabetes         | Adjusted       | 18.5–24.9 | 1.72 (1.12–2.64) | <.05   | No  |

|                     |                           |               |                |           |                  |        |     |
|---------------------|---------------------------|---------------|----------------|-----------|------------------|--------|-----|
|                     | mortality                 | mellitus      | HR             | 25.0–29.9 | Reference        |        |     |
|                     |                           |               |                | ≥ 30.0    | 0.89 (0.58–1.38) | NS     |     |
| Wu, 2014 [32]       | 60-month<br>mortality     | None specific | Adjusted HR    | 15.0–18.4 | 1.92 (1.71-2.15) | <.05   | Yes |
|                     |                           |               |                | 18.5–24.9 | Reference        |        |     |
|                     |                           |               |                | 25–29.9   | 0.82 (0.76-0.88) | <.05   |     |
|                     |                           |               |                | 30–34.9   | 0.82 (0.69-0.98) | <.05   |     |
|                     |                           |               |                | ≥ 35      | 1.59 (1.06-2.38) | <.05   |     |
|                     | 60-month CVD<br>mortality | None specific | Adjusted HR    | 15.0–18.4 | 1.74 (1.36-2.23) | <.05   | Yes |
|                     |                           |               |                | 18.5–24.9 | Reference        |        |     |
|                     |                           |               |                | 25–29.9   | 0.85 (0.73-0.99) | <.05   |     |
|                     |                           |               |                | 30–34.9   | 0.75 (0.51-1.09) | NS     |     |
|                     |                           |               |                | ≥ 35      | 2.36 (1.17-4.76) | <.05   |     |
| Yamauchi, 2014 [64] | In-hospital<br>mortality  | COPD          | Adjusted<br>OR | <18.5     | 1.55 (1.48–1.38) | <.0001 | Yes |
|                     |                           |               |                | 18.5–22.9 | Reference        |        |     |
|                     |                           |               |                | 23.0–24.9 | 0.76 (0.70–0.82) | <.0001 |     |
|                     |                           |               |                | 25.0–29.9 | 0.73 (0.66–0.80) | <.0001 |     |
|                     |                           |               |                | ≥ 30.0    | 0.67 (0.52–0.86) | .002   |     |
| Chen, 2013 [33]     | 18-month<br>mortality     | None specific | Adjusted HR    | <18.5     | Reference        |        | Yes |
|                     |                           |               |                | 18.5–22.9 | 1.93 (1.16-3.20) | <.05   |     |
|                     |                           |               |                | 23.0–24.9 | 0.56 (0.36-0.87) | <.05   |     |
| Dahl, 2013 [34]     | 216-month<br>mortality    | None specific | Adjusted HR    | < 25.0    | Reference        |        | Yes |
|                     |                           |               |                | 25.0–29.9 | 0.80 (0.67-0.95) | <.05   |     |
|                     |                           |               |                | ≥ 30.0    | 0.93 (0.71-1.22) | NS     |     |

|                     |                            |               |             |           |                  |      |     |
|---------------------|----------------------------|---------------|-------------|-----------|------------------|------|-----|
| Nakazawa, 2013 [35] | 12-month mortality         | None specific | Adjusted HR | <17.3     | 2.40 (1.90-3.10) | <.05 | Yes |
|                     |                            |               |             | 17.3–19.2 | 1.70 (1.30-2.30) | <.05 |     |
|                     |                            |               |             | 19.3–21.1 | 1.50 (1.20-2.00) | <.05 |     |
|                     |                            |               |             | 21.2–23.5 | 1.20 (0.90-1.60) | NS   |     |
|                     |                            |               |             | ≥ 23.6    | Reference        |      |     |
| Takata, 2013 [36]   | 144-month mortality        |               | Adjusted HR | < 19.5    | 1.34 (0.93-1.94) | NS   | Yes |
|                     |                            |               |             | 19.5–21.1 | 1.05 (0.72-1.52) | NS   |     |
|                     |                            |               |             | 21.1–22.5 | Reference        |      |     |
|                     |                            |               |             | 22.5–23.8 | 0.63 (0.42-0.94) | <.05 |     |
|                     |                            |               |             | 23.8–26.0 | 0.73 (0.50-1.06) | NS   |     |
|                     |                            |               |             | ≥ 26.0    | 0.82 (0.56-1.21) | NS   |     |
|                     | 144-month CVD mortality    | None specific | Adjusted HR | < 19.5    | 1.40 (0.67-2.90) | NS   | No  |
|                     |                            |               |             | 19.5–21.1 | 1.01 (0.51-2.22) | NS   |     |
|                     |                            |               |             | 21.1–22.5 | Reference        |      |     |
|                     |                            |               |             | 22.5–23.8 | 0.64 (0.29-1.41) | NS   |     |
|                     |                            |               |             | 23.8–26.0 | 0.85 (0.42-1.75) | NS   |     |
|                     |                            |               |             | ≥ 26.0    | 1.27 (0.64-2.53) | NS   |     |
|                     | 144-month cancer mortality |               | Adjusted HR | < 19.5    | 1.46 (0.54-3.93) | NS   | No  |
|                     |                            |               |             | 19.5–21.1 | 1.90 (0.76-4.75) | NS   |     |
|                     |                            |               |             | 21.1–22.5 | Reference        |      |     |
|                     |                            |               |             | 22.5–23.8 | 0.91 (0.32-2.63) | NS   |     |
|                     |                            |               |             | 23.8–26.0 | 1.59 (0.64-3.94) | NS   |     |
|                     |                            |               |             | ≥ 26.0    | 0.87 (0.30-2.51) | NS   |     |

|                     |                     |                   |                                    |           |                  |        |     |
|---------------------|---------------------|-------------------|------------------------------------|-----------|------------------|--------|-----|
| Tseng, 2013 [37]    | 144-month mortality | Diabetes mellitus | Unadjusted rate ratio <sup>#</sup> | <18.5     | 1.48 (1.39–1.58) | <.0001 | Yes |
|                     |                     |                   |                                    | 18.5–22.9 | Reference        |        |     |
|                     |                     |                   |                                    | 23.0–24.9 | 0.71 (0.69–0.74) | <.0001 |     |
|                     |                     |                   |                                    | 25.0–29.9 | 0.66 (0.63–0.68) | <.0001 |     |
|                     |                     |                   |                                    | ≥ 30.0    | 0.68 (0.63–0.73) | <.0001 |     |
| Veronese, 2013 [38] | 60-month mortality  | None specific     | Adjusted HR                        | < 20      | 1.44 (0.95-3.60) | .25    | Yes |
|                     |                     |                   |                                    | 20–24.9   | Reference        |        |     |
|                     |                     |                   |                                    | 25.0–29.9 | 0.90 (0.61-1.71) | .70    |     |
|                     |                     |                   |                                    | ≥ 30.0    | 0.43 (0.20-0.70) | .01    |     |
| Woo, 2013 [39]      | 84-month mortality  | None specific     | Adjusted HR                        | <21.6     | 1.37 (1.00–1.88) | .04    | No  |
|                     |                     |                   |                                    | 21.6–23.5 | Reference        |        |     |
|                     |                     |                   |                                    | 23.5–25.7 | 1.29 (0.95–1.73) | .10    |     |
|                     |                     |                   |                                    | ≥25.7     | 1.53 (1.02–2.29) | .04    |     |
| Yamamoto, 2013 [40] | 30-day mortality    | TAVI patients     | Adjusted HR                        | <18.5     | 1.54 (0.87–2.74) | .14    | No  |
|                     |                     |                   |                                    | 18.5–24.9 | Reference        |        |     |
|                     |                     |                   |                                    | 25.0–29.9 | 0.77 (0.58–1.03) | .08    |     |
|                     | 12-month mortality  |                   | Adjusted HR                        | ≥ 30.0    | 0.71 (0.49–1.03) | .07    | Yes |
|                     |                     |                   |                                    | <18.5     | 1.25 (0.78–2.00) | .35    |     |
|                     |                     |                   |                                    | 18.5–24.9 | Reference        |        |     |
|                     |                     |                   |                                    | 25.0–29.9 | 0.81 (0.66–1.00) | .05    |     |
| Zekry, 2013 [41]    | 48-month mortality  | None specific     | Adjusted HR                        | ≥ 30.0    | 0.74 (0.57–0.97) | .03    | Yes |
|                     |                     |                   |                                    | < 20      | 1.07 (0.73-1.53) | .75    |     |
|                     |                     |                   |                                    | 20.0–24.9 | Reference        |        |     |

|                         |                        |               |                        |           |                  |      |    |
|-------------------------|------------------------|---------------|------------------------|-----------|------------------|------|----|
| de Hollander, 2012 [42] | 120-month<br>mortality | None specific | Adjusted HR            | 25.0–29.9 | 0.78 (0.55-1.10) | .16  | No |
|                         |                        |               |                        | ≥ 30.0    | 0.52 (0.31-0.88) | .02  |    |
|                         |                        |               |                        | < 20      | 1.06 (0.73-1.55) | NS   |    |
|                         |                        |               |                        | 20.0–24.9 | Reference        |      |    |
|                         |                        |               |                        | 25.0–29.9 | 0.92 (0.78-1.09) | NS   |    |
|                         |                        |               |                        | ≥ 30.0    | 1.05 (0.89-1.29) | NS   |    |
|                         |                        |               |                        | < 18.5    | 2.32 (1.75-3.07) | <.05 |    |
|                         |                        |               |                        | 18.5–19.9 | 1.28 (1.03-1.60) | <.05 |    |
|                         |                        |               |                        | 20.0–22.4 | 1.23 (1.09-1.38) | <.05 |    |
|                         |                        |               |                        | 22.5–24.9 | 1.12 (1.02-1.22) | <.05 |    |
| Kvamme, 2012 [43]       | 12-month<br>mortality  | None specific | Adjusted HR<br>(men)   | 25.0–27.4 | Reference        |      | No |
|                         |                        |               |                        | 27.5–29.9 | 1.05 (0.95-1.15) | NS   |    |
|                         |                        |               |                        | 30.0–32.4 | 1.19 (1.05-1.34) | <.05 |    |
|                         |                        |               |                        | 32.5–34.9 | 1.31 (1.09-1.56) | <.05 |    |
|                         |                        |               |                        | ≥ 35      | 1.53 (1.21-1.95) | <.05 |    |
|                         |                        |               |                        | < 18.5    | 1.49 (1.06-2.10) | <.05 |    |
|                         |                        |               |                        | 18.5–19.9 | 1.03 (0.78-1.36) | NS   |    |
|                         |                        |               |                        | 20.0–22.4 | 1.11 (0.97-0.88) | NS   |    |
|                         |                        |               | Adjusted HR<br>(women) | 22.5–24.9 | 0.97 (0.88-1.06) | NS   | No |
|                         |                        |               |                        | 25.0–27.4 | Reference        |      |    |
|                         |                        |               |                        | 27.5–29.9 | 1.04 (0.94-1.14) | NS   |    |
|                         |                        |               |                        | 30.0–32.4 | 1.16 (1.03-1.31) | <.05 |    |
|                         |                        |               |                        | 32.5–34.9 | 1.43 (1.20-1.72) | <.05 |    |
|                         |                        |               |                        | < 18.5    | 1.49 (1.06-2.10) | <.05 |    |
|                         |                        |               |                        | 18.5–19.9 | 1.03 (0.78-1.36) | NS   |    |
|                         |                        |               |                        | 20.0–22.4 | 1.11 (0.97-0.88) | NS   |    |

|                          |                        |                      |                  |                  |    |
|--------------------------|------------------------|----------------------|------------------|------------------|----|
| 12-month RD<br>mortality | Adjusted HR<br>(men)   | ≥ 35                 | 1.53 (1.24-1.90) | <.05             | No |
|                          |                        | < 20.0               | 4.35 (2.87-6.60) | <.05             |    |
|                          |                        | 20.0–22.4            | 2.45 (1.76-3.40) | <.05             |    |
|                          |                        | 22.5–24.9            | 1.58 (1.19-2.10) | <.05             |    |
|                          |                        | 25.0–27.4            | Reference        |                  |    |
|                          |                        | 27.5–29.9            | 0.81 (0.57-1.16) | NS               |    |
|                          |                        | ≥ 30                 | 1.18 (0.81-1.71) | NS               |    |
|                          | Adjusted HR<br>(women) | < 20.0               | 3.30 (2.07-5.27) | <.05             | No |
|                          |                        | 20.0–22.4            | 1.83 (1.21-2.75) | <.05             |    |
|                          |                        | 22.5–24.9            | 1.32 (0.91-1.91) | NS               |    |
|                          |                        | 25.0–27.4            | Reference        |                  |    |
|                          |                        | 27.5–29.9            | 0.84 (0.54-1.28) | NS               |    |
|                          |                        | ≥ 30                 | 1.06 (0.73-1.55) | NS               |    |
|                          |                        | Adjusted HR<br>(men) | < 20.0           | 1.14 (0.84-1.54) |    |
| 20.0–22.4                | 0.98 (0.82-1.19)       |                      | NS               |                  |    |
| 22.5–24.9                | 1.07 (0.94-1.22)       |                      | NS               |                  |    |
| 25.0–27.4                | Reference              |                      |                  |                  |    |
| 27.5–29.9                | 1.12 (0.98-1.28)       |                      | NS               |                  |    |
| ≥ 30                     | 1.33 (1.14-1.54)       |                      | <.05             |                  |    |
| Adjusted HR<br>(women)   | < 20.0                 |                      | 1.28 (0.98-1.67) | NS               | No |
|                          | 20.0–22.4              | 1.21 (1.01-1.44)     | <.05             |                  |    |
|                          | 22.5–24.9              | 1.01 (0.98-1.32)     | NS               |                  |    |
|                          | 25.0–27.4              | Reference            |                  |                  |    |





|                     |                                 |               |                     |                                                       |                                                                                           |                              |     |
|---------------------|---------------------------------|---------------|---------------------|-------------------------------------------------------|-------------------------------------------------------------------------------------------|------------------------------|-----|
|                     |                                 |               | Adjusted HR (Women) | <21.0<br>21.0–27.0<br>> 27.0                          | 1.76 (1.00-3.13)<br>Reference<br>0.62 (0.26-1.49)                                         | <.05<br><br>NS               | No  |
|                     | 48-month mortality (≥ 75 years) |               | Adjusted HR (Men)   | <21.0<br>21.0–27.0<br>> 27.0                          | 1.54 (1.15–2.06)<br>Reference<br>0.57 (0.29–1.12)                                         | <.01<br><br>NS               | No  |
|                     |                                 |               | Adjusted HR (Women) | <21.0<br>21.0–27.0<br>> 27.0                          | 2.05 (1.44–2.91)<br>Reference<br>0.83 (0.46–1.52)                                         | <.001<br><br>NS              | No  |
| Cereda, 2011 [45]   | 73-month mortality              | None specific | Adjusted HR         | < 21.0<br>21.0–24.9<br>≥ 25.0                         | 1.53 (1.13-2.06)<br>1.04 (0.77-1.40)<br>Reference                                         | .006<br>.79                  | Yes |
| Berraho, 2010 [46]  | 156-month mortality             | None specific | Adjusted HR         | < 18.5<br>18.5–21.9<br>22.0–24.9<br>25.0-29.9<br>≥ 30 | 1.45 (1.17-1.78)<br>1.27 (1.12-1.43)<br>Reference<br>0.98 (0.88-1.10)<br>1.06 (0.89-1.27) | <.05<br><.05<br><br>NS<br>NS | No  |
| Han, 2010 [47]      | 42-month mortality              | None specific | Adjusted HR         | < 22.0<br>22.0–26.1<br>≥ 26.1                         | Reference<br>0.93 (0.50-1.72)<br>0.54 (0.22-1.36)                                         | .81<br>.19                   | No  |
| Kitamura, 2010 [48] | 24-month mortality              | None specific | Adjusted OR         | <17.1<br>≥ 17.1                                       | 3.96 (1.79-8.79)<br>Reference                                                             | .0007                        | Yes |
| Lea, 2009 [66]      | 125-month                       | AMI           | Adjusted            | <18.5                                                 | 1.45 (1.40–1.51)                                                                          | <.0001                       | Yes |

|                       |                           | mortality     |             | HR        | 18.5–24.9         | Reference        |        |
|-----------------------|---------------------------|---------------|-------------|-----------|-------------------|------------------|--------|
|                       |                           |               |             |           | 25.0–29.9         | 0.85 (0.83–0.87) | <.0001 |
|                       |                           |               |             |           | 30.0–34.9         | 0.85 (0.83–0.87) | <.0001 |
|                       |                           |               |             |           | 35.0–39.9         | 0.89 (0.84–0.93) | <.0001 |
|                       |                           |               |             |           | ≥ 40.0            | 0.95 (0.88–1.01) | .11    |
| Luchsinger, 2008 [49] | 144-month mortality       | None specific | Adjusted HR | <23.0     | 1.60 (1.20-2.00)  | <.05             | No     |
|                       |                           |               |             | 23.0–26.1 | Reference         |                  |        |
|                       |                           |               |             | 26.2–29.4 | 1.10 (0.80-1.40)  | NS               |        |
|                       |                           |               |             | ≥ 29.4    | 1.10 (0.80-1.40)  | NS               |        |
| Locher, 2007 [50]     | 36-month mortality        | None specific | Adjusted HR | < 18.5    | 2.18 (1.02-4.66)  | .45              | No     |
|                       |                           |               |             | 18.5–24.9 | Reference         |                  |        |
|                       |                           |               |             | 25.0–29.9 | 1.25 (0.83-1.87)  | .28              |        |
|                       |                           |               |             | 30.0-34.9 | 0.83 (0.49-1.42)  | .50              |        |
|                       |                           |               |             | ≥ 35      | 0.92 (0.47-1.80)  | .81              |        |
| Takata, 2007 [51]     | 48-month mortality        | None specific | Adjusted HR | < 18.5    | 1.94 (1.00-3.76)  |                  | Yes    |
|                       |                           |               |             | 18.5–24.9 | Reference         | <.05             |        |
|                       |                           |               |             | ≥ 25.0    | 0.48 (0.24-0.96)  |                  |        |
|                       | 48-month CVD mortality    |               |             | < 18.5    | 4.64 (1.68-12.80) |                  | Yes    |
|                       |                           |               |             | 18.5–24.9 | Reference         | <.05             |        |
|                       |                           |               |             | ≥ 25.0    | 1.02 (0.35-2.95)  |                  |        |
|                       | 48-month cancer mortality |               |             | < 18.5    | 2.17 (0.60-7.85)  |                  | No     |
|                       |                           |               |             | 18.5–24.9 | Reference         | NS               |        |
|                       |                           |               |             | ≥ 25.0    | 0.26 (0.06-1.20)  |                  |        |

|                      |                       |               |             |           |                  |        |     |
|----------------------|-----------------------|---------------|-------------|-----------|------------------|--------|-----|
| Grabowski, 2001 [67] | 96-month<br>mortality | None specific | Adjusted HR | < 19.4    | 1.58 (1.41-1.78) | <.0001 | Yes |
|                      |                       |               |             | 19.5–28.4 | Reference        |        |     |
|                      |                       |               |             | ≥ 28.5    | 0.83 (0.74-0.94) | .002   |     |

HR/OR: Hazard ratio / Odds ratio; ID: Infectious diseases

\* 95% CI were not computed

# The estimates and their respective confidence intervals were not presented in the original articles, but were calculated with the information available in these articles.

TAVI: Transcatheter Aortic Valve Implementation; AHF: Acute heart failure; COPD: Chronic Obstructive Pulmonary Disease; AMI: Acute Myocardial Infarction; RD: Respiratory disease; CVD: cardiovascular disease.
